# Supplementary material for: Abyssal fauna of the UK-1 polymetallic nodule exploration claim, Clarion-Clipperton Zone, central Pacific Ocean: Echinodermata
Source: Biodivers Data J. 2016 Jan 25;(4):e7251. doi: 10.3897/BDJ.4.e7251 (PMC4759440; doi:10.3897/BDJ.4.e7251)
Supplement: Supplementary material 1 — Taxa table [file biodiversity_data_journal-4-e7251-s001.xlsx]

## Sheet: Echinodermata taxa list.tsv
Taxon name	Genbank accession number
	16S	18S	COI
ASTEROIDEA
Acodontaster conspicuus	GU226973	DQ060774	DQ380237
Aphelasterias japonica	AB084575	AB125600	DQ992560
Aquilonastra coronata	AB084567	AB084566	AY370747
Archaster typicus	AB084559	AB084547	AF217356
Asterias forbesi	DQ297073	DQ060776	AF498640
Asterias rubens	AY652504	AY935561	GU672414
Asterina gibbosa	AY370726	AF088801	U50058
Astropecten articulatus	DQ297079	DQ060781	DQ380242
Brisingaster robillardi	EU722978	AF088802	AF217392
Coscinasterias muricata	DQ297083	DQ060783	EU869908
Crossaster papposus	DQ297084	AB084556	GU672421
Dermasterias imbricata	AY370718	DQ060784	HM542164
Diplodontias miliaris	DQ297078	DQ060780	DQ380240
Eremicaster pacificus	HM543144	---	HM542930
Eurygonias hylacanthus	DQ297089	DQ060787	DQ380238
Evasterias troschelii	DQ297090	DQ060788	GQ902403
Gorgonocephalus chilensis	AB758495	AB758525	KM491788
Henricia sanguinolenta	AY652499	DQ077936	HM542199
Leptasterias alaskensis	AY548864	AY935559	EU143727
Leptasterias hexactis	DQ297094	DQ060793	HM542233
Leptasterias muelleri	AY652505	AY935558	DQ077922
Leptasterias polaris	HM473890	AY935556	GU670177
Lethasterias nanimensis	AY548871	AY935563	DQ077923
Linckia laevigata	DQ297095	DQ060794	FJ385995
Luidia foliolata	EU072952	AF088805	HM473926
Luidia maculata	D63741	AB084548	JQ740635
Macroptychaster accrescens	DQ297098	DQ060797	GU227104
Marthasterias glacialis	AY706152	AY935547	KF369150
Mediaster aequalis	EU072953	DQ060798	GU670193
Myxoderma platyacanthum	AY706153	DQ060799	AF217391
Notasterias pedicellaris	AY706149	AY935549	DQ077926
Odinella nutrix	AY706145	AY935550	DQ077927
Odontaster meridionalis	GQ294433	DQ060800	GQ294363
Odontaster validus	GQ294457	AJ888031	KF050246
Ophiopholis aculeata	DQ297105	DQ060806	KJ620605
Orthasterias koehleri	AY548874	DQ060810	GU670190
Patiria miniata	AY370722	DQ060777	JN259388
Patiriella regularis	AY370734	DQ060811	EU870022
Pedicellaster magister	AY548878	AY935569	HM473941
Pisaster brevispinus	AY548875	AY935554	HM542328
Pisaster giganteus	AY548876	AY935555	AF485001
Pisaster ochraceus	DQ297110	DQ060813	HM542338
Porania antarctica	EF624418	GU227038	GU227099
Psalidaster mordax	AY706150	AY935551	DQ077931
Pseudarchaster parelii	EU722965	AF088806	HM542959
Pteraster militaris	EU722967	DQ060814	GU672430
Pteraster tesselatus	DQ297111	AF088808	HM473951
Pycnopodia helianthoides	AY548877	AY935565	HM542364
Rathbunaster californicus	HM151310	AF088807	AF217387
Solaster dawsoni	GQ288519	AB084557	HM542369
Solaster stimpsoni	DQ297113	DQ060819	HM542382
Stegnaster inflatus	AY370719	DQ060820	AY077743
Stichaster australis	EU722985	DQ060821	DQ380244
Stylasterias forreri	AY548881	AY935562	HM542419
Tarsaster alaskanus	AY706143	AY935568	DQ077933
Urasterias lincki	AY548882	AY935553	GU672415
CRINOIDEA
Anachalypsicrinus nefertiti	KC626600	KC626692	KC626506
Andrometra psyche	KC626601	KC626693	KC626507
Annametra occidentalis	KC626602	KC626694	KC626508
Anneissia bennetti	KJ875058	GQ913330	KJ875015
Antedon bifida	KC626604	KC626696	KC626510
Antedon cf. iris AI390	KC626605	KC626697	KC626511
Antedon cf. parviflora AP377MV	KC626606	KC626699	KC626513
Antedon hupferi	KC626607	KC626700	KC626514
Antedon incommoda	KC626608	KC626701	KC626515
Antedon loveni	KC626609	KC626702	KC626516
Antedon mediterranea	KC626603	KC626695	KC626517
Antedon petasus	KC626611	KC626704	KC626518
Antedon serrata	KC626612	KC626705	KC626519
Anthometrina adriani	JQ340211	KC626706	KC626520
Aphanocomaster pulcher	KC626613	KC626707	KC626521
Aporometra sp. LH153	KC626614	KC626708	KC626522
Argyrometra mortenseni	KC626615	KC626709	KC626523
Asterometra cf. cristata ACRI45	KC626616	KC626710	KC626524
Atelecrinidae sp. 'vallatus'	KC626598	KC626690	KC626504
Atelecrinidae sp. 'wyvilli'	KC626665	KC626759	KC626573
Caledonicrinus vaubani	AY275900	KC626711	KC626525
Calometra discoidea	KC626618	KC626712	KC626526
Capillaster multiradiatus	---	AF088809	KJ874984
Capillaster squarrosus	---	KC626713	KC626527
Charitometra basicurva	KC626620	KC626714	KC626528
Chondrometra rugosa	KC626621	KC626715	KC626529
Clarkcomanthus albinotus	KJ875029	GQ913328	KJ874987
Clarkcomanthus comanthipinnus	GU327897	GQ913334	GQ913318
Clarkcomanthus littoralis	KJ875030	GQ913344	KJ874988
Clarkcomanthus luteofuscum	KM491765	KC626716	KM491782
Clarkcomanthus mirabilis	KJ875039	GQ913329	GQ913313
Coccometra hagenii	KC626623	KC626717	KC626531
Colobometra perspinosa	GU327891	GQ913338	KM491786
Comanthus gisleni	KJ875037	GU327935	GU327856
Comanthus wahlbergii	KJ875044	GU327934	KF175651
Comaster audax	KJ875046	GU327933	KJ875002
Comaster schlegelii	KJ875048	GQ913333	KJ875004
Comatella stelligera	KJ875051	GU327936	KJ875007
Comatonia cristata	KC626624	KC626718	KC626532
Comatula pectinata	KJ875052	KC626719	KJ875009
Comissia norfolkensis	KC626626	KC626720	KC626534
Cyllometra manca	KC626627	KC626721	KC626535
Decametra cf. alaudae DECA32	KC626628	KC626722	KC626536
Democrinus cf. rawsonii CON145	KC626629	KC626723	KC626537
Democrinus weberi	KC626630	KC626724	KC626538
Dorometra briseis	KC626631	KC626725	KC626539
Dumetocrinus aff. antarcticus DUM11	KC626632	KC626726	KC626540
Endoxocrinus alternicirrus	GU327873	KC626727	KC626542
Endoxocrinus parrae	GU327874	Z80951	GQ913324
Eometra cf. weddelli EO4591	KC626635	KC626729	KC626543
Euantedon sp. EUA470	KC626636	KC626730	KC626544
Eudiocrinus cf. pinnatus ME70	KC626637	KC626731	KC626545
Eudiocrinus serripinna	KC626638	KC626732	KC626546
Eumorphometra sp. EUM03	KC626639	KC626733	KC626547
Evasterias troschelii	DQ297090	DQ060788	HM542180
Florometra asperrima	KC626640	KC626734	KC626548
Florometra mawsoni	KC626641	KC626735	KC626549
Florometra novaezealandiae	KC626642	KC626736	KC626550
Florometra serratissima	DQ297091	KC626737	KC626551
Hathrometra tenella	KC626644	KC626738	KC626552
Heliometra glacialis	JX312800	KC626739	KC626553
Heterometra crenulata	KC626646	KC626740	KC626554
Himerometra cf. robustipinna HROB42	KC626647	KC626741	KC626555
Himerometra robustipinna	GU327898	GQ913332	GQ913316
Holopus alidis	AY275903	KC626742	KC626556
Homalometra denticulata	KC626649	KC626743	KC626557
Hyocrinus bethellianus	KC626650	KC626744	KC626558
Hyocrinus cf. biscoitoi GWR-2010	GU327870	GU327930	GU327837
Hypalocrinus naresianus	KC626651	KC626745	KC626559
Hypalocrinus sp. HYP1	KC626652	KC626746	KC626560
Koehlermetra porrecta	KC626653	KC626747	KC626561
Lamprometra palmata	GU327899	KC626748	KC626562
Leptometra celtica	KC626655	KC626749	KC626563
Liparometra articulata	GU327900	GQ913335	GQ913319
Mariametra subcarinata	KC626656	KC626750	KC626564
Metacrinus levii	GU327877	KC626751	KC626565
Metacrinus rotundus	AY275905	AY275898	KC626566
Metacrinus serratus	KC626659	KC626753	KC626567
Nanometra cf. johnstoni ME14	KC626661	KC626755	KC626569
Neogymnocrinus richeri	AY275902	KC626756	KC626570
Neometra sappho	KC626663	KC626757	KC626571
Notocrinus virilis	GU327901	KC616751	JN545453
Oligometra carpenteri	KC626664	KC626758	KC626572
Pentametrocrinus cf. semperi PENT51	KC626666	KC626760	KC626574
Perometra robusta	KC626667	KC626761	KC626575
Phanogenia gracilis	KJ875062	GQ913331	KJ875019
Phrynocrinus nudus	KC626668	KC626762	KC626576
Poliometra prolixa	KC626669	KC626763	KC626577
Porphyrocrinus cf. verrucosus POR138	KC626670	KC626764	KC626578
Porphyrocrinus thalassae	KC626671	KC626765	KC626579
Promachocrinus kerguelensis	JQ340229	KC616736	KM491771
Psathyrometra sp. ME25	KC626672	KC626766	KC626580
Pterometra trichopoda	KC626673	KC626767	KC626581
Ptilocrinus australis	KC626674	KC616754	KC626582
Ptilocrinus clarki	KC626675	KC626769	KC626584
Ptilometra macronema	GU327903	KC626770	KC626585
Saracrinus angulatus	KC626678	KC626771	KC626586
Saracrinus nobilis	KC626679	KC626772	KC626587
Sarametra triserialis	KC626680	KC626773	KC626588
Stenometra cristata	KC626681	KC626774	KC626589
Strotometra ornatissimus	KC626682	KC626775	KC626590
Thalassocrinus cf. pontifer ALCP284271	KC626683	KC626776	KC626591
Thalassometra cf. margaritifera THA38	KC626684	KC626777	KC626592
Thaumatocrinus renovatus	KC626685	KC626778	KC626593
Toxometra bicolor	KC626686	KC626779	KC626594
Trichometra cubensis	KC626687	KC626780	KC626595
Tropiometra cf. carinata MADA04	KC626688	KC626781	KC626596
Vityazicrinus sp. GWR-2010	GU327884	GU327931	GU327847
Zygometra andromeda	KC626689	KC626782	KC626597
HOLOTHUROIDEA
Actinopyga agassizi	JN207496	---	---
Actinopyga caerulea	EU822433	---	---
Actinopyga echinites	EU822437	---	---
Actinopyga lecanora	EU822465	---	---
Actinopyga mauritiana	KF479390	---	---
Actinopyga miliaris	EU822467	---	---
Actinopyga obesa	EU220794	---	---
Actinopyga palauensis	EU822432	---	---
Actinopyga sp AK2003	AY338413	---	---
Actinopyga spinea	EU822447	---	---
Apodida sp Undetermined 2 KKR2008	FJ223867	---	---
Apostichopus japonicus	AY852279	---	---
Astichopus multifidus	EU822453	---	---
Athyonidium chilensis	EU822439	---	---
Australostichopus mollis	EU856674	---	---
Bohadschia argus	JN543427	---	---
Bohadschia atra	JN543403	---	---
Bohadschia bivittata	AY574876	---	---
Bohadschia cousteaui	JN543401	---	---
Bohadschia marmorata	JN543423	---	---
Bohadschia paradoxa	JN543409	---	---
Bohadschia sp 1 SWK2011	EU220795	---	---
Bohadschia sp 2 SWK2011	JN543405	---	---
Bohadschia sp 3 SWK2011	JN543420	---	---
Bohadschia vitiensis	JN543424	---	---
Chiridota laevis	U15596	---	---
Cucamba psolidiformis	JX133924	---	---
Cucumaria frondosa	KF479389	---	---
Cucumaria georgiana	JX133921	---	---
Cucumaria sp ZP0016	KF459959	---	---
Cucumariidae sp RG2014	KF713451	---	---
Evasterias troschelii	DQ297090	---	---
Heterocucumis steineni	JX133923	---	---
Holothuria aff impatiens KKR2008	FJ223857	---	---
Holothuria arenicola	JN207556	---	---
Holothuria arguinensis	KJ648689	---	---
Holothuria atra	KF479397	---	---
Holothuria austrinabassa	EU220797	---	---
Holothuria bacilla	KF479394	---	---
Holothuria carere	JN207550	---	---
Holothuria cinerascens	JN207554	---	---
Holothuria coluber	FJ223866	---	---
Holothuria dakarensis	EU191980	---	---
Holothuria edulis	KF479395	---	---
Holothuria erinacea	JN207563	---	---
Holothuria excellens	AY338418	---	---
Holothuria flavomaculata	KF479392	---	---
Holothuria floridana	JN207502	---	---
Holothuria forskali	GQ214740	---	---
Holothuria fuscocinerea	JN207560	---	---
Holothuria glaberrima	JN207525	---	---
Holothuria grisea	EU220800	---	---
Holothuria hilla	JN207515	---	---
Holothuria imitans	JN207562	---	---
Holothuria impatiens	JN207526	---	---
Holothuria inornata	JN207498	---	---
Holothuria kefersteini	JN207500	---	---
Holothuria languens	JN207531	---	---
Holothuria lentiginosa	JN207557	---	---
Holothuria leucospilota	JQ657266	---	---
Holothuria lubrica	JN207497	---	---
Holothuria mactanensis	JN207510	---	---
Holothuria mammata	KJ812174	---	---
Holothuria mexicana	EU822443	---	---
Holothuria moebii	KF479398	---	---
Holothuria nigralutea	EU220804	---	---
Holothuria nobilis	EU822441	---	---
Holothuria notabilis	KJ801944	---	---
Holothuria ocellata	FJ223869	---	---
Holothuria pardalis	FJ223861	---	---
Holothuria parva	KT159718	---	---
Holothuria pluricuriosa	JN207559	---	---
Holothuria poli	KJ812164	---	---
Holothuria portovallartensis	JN207558	---	---
Holothuria sanctori	GQ214742	---	---
Holothuria scabra	JQ657264	---	---
Holothuria scabra versicolor	AY509146	---	---
Holothuria signata	EU220812	---	---
Holothuria surinamensis	JN207528	---	---
Holothuria theeli	JN207520	---	---
Holothuria tubulosa	KJ812188	---	---
Holothuria whitmaei	AY509147	---	---
Holothuria zacae	JN207516	---	---
Isostichopus badionotus	EU822435	---	---
Isostichopus fuscus	AY153499	---	---
Isostichopus macroparentheses	AY338415	---	---
Labidodemas semperianum	AY338420	---	---
Mesothuria bifurcata	AY153493	---	---
Mesothuria milleri	AY151135	---	---
Mesothuria multipora	AY153488	---	---
Molpadiida sp SHI2011a	JN120780	---	---
Molpadiida sp Undetermined KKR2008	FJ223870	---	---
Pannychia moseleyi	HM543148	---	---
Parastichopus californicus	DQ777096	---	---
Pearsonothuria graeffei	EU822440	---	---
Pentacta pygmaea	DQ777097	---	---
Pentamera calcigera	HM543158	---	---
Protelpidia murrayi	KF713450	---	---
Pseudostichopus villosus	DQ777098	---	---
Psolus charcoti	JX133922	---	---
Psolus fabricii	U15597	---	---
Psolus phantapus	HM543159	---	---
Psychropotes longicauda	DQ777099	---	---
Stichopus chloronotus	JQ657267	---	---
Stichopus ellipes	EU856626	---	---
Stichopus hermanni	JN120784	---	---
Stichopus horrens	JQ657263	---	---
Stichopus monotuberculatus	EU856660	---	---
Stichopus naso	KF479391	---	---
Stichopus ocellatus	EU856681	---	---
Stichopus vastus	EU856709	---	---
Thelenota rubralineata	EU822452	---	---
Zygothuria lactea	AY153491	---	---
OPHIUROIDEA
Amphipholis squamata	AY652510	X97156	KP255315
Asteromorpha capensis	AB758510	AB758546	AB758754
Asteromorpha rousseaui	AB758509	AB758545	AB758756
Asteronyx loveni	AB605076	AB605126	HM542914
Asteroporpa australiensis	AB605098	AB605145	AB758758
Asteroporpa hadracantha	AB605097	AB605144	AB758759
Asteroporpa muricatopatella	AB605100	AB605147	AB758760
Asteroporpa reticulata	AB605099	AB605146	AB758761
Asteroschema ajax	AB605078	AB758519	AB758762
Asteroschema edmondsoni	AB758486	AB758536	AB758831
Asteroschema horridum	AB758487	AB758542	AB758764
Asteroschema migrator	AB758485	AB758535	AB758765
Asteroschema oligactes	AB758483	AB758540	AB758766
Asterostegus sp SMNH Type8333	AB758511	AB758547	AB758768
Asterostegus tuberculatus	AB758515	AB758552	AB758769
Astroboa arctos	AB605101	AB605148	AB758770
Astroboa globifera	AB605102	AB605149	AB758771
Astroboa nigrofurcata	AB758505	AB758538	AB758772
Astroboa nuda	AB758499	AB758529	AB758773
Astroboa sp FMNH UF5053	AB605103	AB605150	AB758774
Astroboa sp RUMF ZE00014	AB758501	AB758531	AB758829
Astrobrachion adhaerens	AB605081	AB605128	AB758776
Astrobrachion constrictum	AB605082	Z80948	AB758777
Astroceras annulatum	AB605089	AB605135	AB758778
Astroceras compar	AB605090	AB605136	AB758779
Astroceras nodosum	AB758506	AB758539	AB758781
Astroceras pergamenum	AB605091	AB605137	AB758782
Astroceras pleiades	AB605708	AB605138	AB758783
Astroceras spinigerum	AB758508	AB758544	AB758786
Astrocharis monospinosa	AB605083	AB605129	AB758787
Astrochele lymani	AB758504	AB758537	AB758788
Astrochele pacifica	AB605104	AB605151	AB758789
Astrochlamys sol	AB758503	AB758534	AB758790
Astrocladus coniferus	AB605105	AB605152	AB758791
Astrocladus exiguus	AB605106	AB605153	AB758792
Astrodendrum sagaminum	AB605109	AB605156	AB758795
Astrodendrum sp NSMT E6273	AB605110	AB605157	AB758796
Astrodia tenuispina	AB605077	AB605632	AB758828
Astroglymma sculptum	AB605111	AB605158	AB758797
Astrohamma tuberculatum	AB605112	AB605159	AB758798
Astrophyton muricatum	AB605113	AB605160	AB758799
Astrosierra amblyconus	AB605114	AB605161	AB758800
Astrothamnus echinaceus	AB605115	AB605162	AB758802
Astrothorax misakiensis	AB605116	AB605163	AB758803
Astrothorax waitei	AB605117	AB605164	AB758804
Astrothrombus chrysanthi	AB605118	AB605165	AB758801
Astrothrombus rugosus	AB605119	AB605166	AB758805
Astrothrombus vecors	AB605120	AB605167	AB758830
Astrotoma agassizii	AB758493	AB758520	AB758806
Conocladus australis	AB758491	AB758518	AB758807
Euryale aspera	AB605093	AB605140	AB758808
Evasterias troschelii	DQ297090	DQ060788	HM542180
Gorgonocephalus chilensis	AB758495	AB758525	KM491788
Gorgonocephalus eucnemis	AB605121	DQ060790	GU670194
Gorgonocephalus pustulatum	AB605122	AB605169	AB758810
Gorgonocephalus tuberosus	AB758496	AB758526	AB758811
Ophiocoma echinata	DQ297102	DQ060802	KC626186
Ophiocreas ambonesicum	AB605084	AB605130	AB758813
Ophiocreas caudatus	AB605085	AB605131	AB758814
Ophiocreas glutinosum	AB605086	AB605132	AB758815
Ophiocreas japonicus	AB758488	AB758524	AB758816
Ophiocreas oedipus	AB758489	AB758523	AB758817
Ophiocreas sibogae	AB605087	AB605133	AB758818
Ophiocreas spinulosus	AB758490	AB758533	AB758820
Ophiomyxa anisacantha	AB605124	AB605172	AB758822
Ophionereis reticulata	DQ297108	DQ060805	KC626216
Ophiopholis aculeata	DQ297105	DQ060806	GU670181
Squamophis albozosteres	AB605080	AB605127	AB758823
Squamophis amamiensis	AB758502	AB758532	AB758824
Sthenocephalus anopla	AB605094	AB605141	AB758825
Trichaster acanthifer	AB605095	AB605142	AB758826
Trichaster palmiferus	AB605096	AB605143	AB758827
