# Supplementary material for: Abyssal fauna of the UK-1 polymetallic nodule exploration claim, Clarion-Clipperton Zone, central Pacific Ocean: Echinodermata
Source: Biodivers Data J. 2016 Jan 25;(4):e7251. doi: 10.3897/BDJ.4.e7251 (PMC4759440; doi:10.3897/BDJ.4.e7251)
Supplement: Supplementary material 2 — Tree file from Asteroidea phylogenetic analyses [file biodiversity_data_journal-4-e7251-s002.con]

#NEXUS

[ID: 6158806576]
begin trees;
   [Note: This tree contains information on the topology, 
          branch lengths (if present), and the probability
          of the partition indicated by the branch.]
   tree con_50_majrule = (Gorgonocephalus_chilensis:0.763174,Ophiopholis_aculeata:1.279395,((((((((((Asteroidea_sp_NHM_054:0.024779,Styracaster_paucispinus:0.040548)1.00:0.043841,Porcellanaster_cf_ceruleus:0.086796)0.56:0.018826,Eremicaster_pacificus:0.066367)1.00:0.123146,Pseudarchaster_parelii:0.317325)0.70:0.029397,(Astropecten_articulatus:0.203975,Linckia_laevigata:0.275867)0.79:0.039347)0.89:0.035842,(((((Acodontaster_conspicuus:0.011661,Odontaster_validus:0.043167)0.66:0.009349,Diplodontias_miliaris:0.066871)0.81:0.017880,Eurygonias_hylacanthus:0.074777)0.97:0.050820,Odontaster_meridionalis:0.176536)1.00:0.073166,((Luidia_foliolata:0.257390,Luidia_maculata:0.285527)1.00:0.179349,Macroptychaster_accrescens:0.131051)1.00:0.112338)0.60:0.028724,Porania_antarctica:0.182887)0.59:0.028111,(((Aquilonastra_coronata:0.220523,Asterina_gibbosa:0.159600,((Crossaster_papposus:0.026602,(Solaster_dawsoni:0.028156,Solaster_stimpsoni:0.038136)0.88:0.022774)1.00:0.191905,(Patiria_miniata:0.074174,Stegnaster_inflatus:0.136820)0.60:0.025627)0.99:0.038046,Patiriella_regularis:0.115200)1.00:0.038483,(Archaster_typicus:0.245342,Henricia_sanguinolenta:0.329066)1.00:0.118661)0.98:0.030307,Dermasterias_imbricata:0.134288)0.97:0.035877,Mediaster_aequalis:0.255819)0.93:0.122641,(((((((Aphelasterias_japonica:0.042448,(Asterias_forbesi:0.209498,Asterias_rubens:0.047017)0.68:0.032013)1.00:0.048061,(((Evasterias_troschelii:0.025243,Pisaster_ochraceus:0.036715)1.00:0.030517,(((Leptasterias_alaskensis:0.009875,Leptasterias_hexactis:0.010871)1.00:0.005085,Leptasterias_polaris:0.012967)0.58:0.003954,Leptasterias_muelleri:0.022913)1.00:0.022942)1.00:0.046829,(Pisaster_brevispinus:0.020649,Pisaster_giganteus:0.045577)1.00:0.069124)0.85:0.015236)0.57:0.012866,Orthasterias_koehleri:0.075955,(Pycnopodia_helianthoides:0.039911,Rathbunaster_californicus:0.071952)1.00:0.039594)0.75:0.010231,(Lethasterias_nanimensis:0.028031,Stylasterias_forreri:0.036278)1.00:0.063696)1.00:0.037962,(Marthasterias_glacialis:0.110640,Urasterias_lincki:0.065226)0.90:0.026384)1.00:0.028576,Coscinasterias_muricata:0.157005)0.57:0.010675,(Notasterias_pedicellaris:0.016235,Psalidaster_mordax:0.034890)1.00:0.071545)1.00:0.105039,Myxoderma_platyacanthum:0.226628,((Pedicellaster_magister:0.373877,(Pteraster_militaris:0.295019,Pteraster_tesselatus:0.172838)1.00:0.443263)0.59:0.062560,Tarsaster_alaskanus:0.231275)0.75:0.047812,Stichaster_australis:0.168075)1.00:0.092061,(Brisingaster_robillardi:0.164459,Odinella_nutrix:0.098775)1.00:0.095500)1.00:0.196195,Freyastera_cf_benthophila:0.107892)1.00:1.026899);
end;
