# Supplementary material for: Abyssal fauna of the UK-1 polymetallic nodule exploration claim, Clarion-Clipperton Zone, central Pacific Ocean: Echinodermata
Source: Biodivers Data J. 2016 Jan 25;(4):e7251. doi: 10.3897/BDJ.4.e7251 (PMC4759440; doi:10.3897/BDJ.4.e7251)
Supplement: Supplementary material 3 — Tree file from Crinoidea phylogenetic analyses [file biodiversity_data_journal-4-e7251-s003.con]

#NEXUS

[ID: 4389606051]
begin trees;
   [Note: This tree contains information on the topology, 
          branch lengths (if present), and the probability
          of the partition indicated by the branch.]
   tree con_50_majrule = (Evasterias_troschelii:2.671080,(Holopus_alidis:0.391873,Neogymnocrinus_richeri:0.139878)0.69:0.062337,((((((Crinoidea_sp_NHM_008:0.054082,Dumetocrinus_aff_antarcticus_DUM11:0.080507)0.74:0.013862,(Anachalypsicrinus_nefertiti:0.058097,(Hyocrinus_bethellianus:0.052555,Thalassocrinus_cf_pontifer_ALCP284271:0.034752)0.79:0.014827)0.99:0.033184)0.90:0.019648,(Hyocrinus_cf_biscoitoi_GWR2010:0.067778,Ptilocrinus_clarki:0.076326)0.91:0.017134)1.00:0.054409,Ptilocrinus_australis:0.121806)1.00:0.229895,((((Crinoidea_sp_NHM_055:0.170963,Phrynocrinus_nudus:0.111995)0.63:0.020560,(Porphyrocrinus_cf_verrucosus_POR138:0.101508,Porphyrocrinus_thalassae:0.102649)1.00:0.064168)0.99:0.094867,((Atelecrinidae_sp_vallatus:0.056445,Atelecrinidae_sp_wyvilli:0.051304)1.00:0.122887,(Democrinus_cf_rawsonii_CON145:0.125590,Democrinus_weberi:0.161070)1.00:0.220747)0.84:0.039590)0.51:0.023243,((((((((Crinoidea_sp_NHM_056:0.052157,Nanometra_cf_johnstoni_ME14:0.093696)0.72:0.036782,(((Hathrometra_tenella:0.033293,Poliometra_prolixa:0.030757)1.00:0.028818,Trichometra_cubensis:0.051311)0.99:0.029007,Leptometra_celtica:0.080845)0.97:0.026141)0.61:0.017059,Eumorphometra_sp_EUM03:0.159718,Perometra_robusta:0.077350)0.62:0.016085,(Crinoidea_sp_NHM_300:0.032447,Eometra_cf_weddelli_EO4591:0.013170)1.00:0.085391)0.87:0.019858,(((Andrometra_psyche:0.166838,(Antedon_loveni:0.093136,((Antedon_serrata:0.060438,(Euantedon_sp_EUA470:0.078773,Toxometra_bicolor:0.146273)0.85:0.028752)0.95:0.028549,Dorometra_briseis:0.073800)1.00:0.034707)1.00:0.034265)0.76:0.015219,(Antedon_incommoda:0.157749,(Aporometra_sp_LH153:0.193440,(Eudiocrinus_cf_pinnatus_ME70:0.043751,Eudiocrinus_serripinna:0.026774)1.00:0.078005)0.69:0.019444)0.94:0.019678)1.00:0.118728,(((Antedon_cf_iris_AI390:0.055481,Argyrometra_mortenseni:0.090022)0.85:0.020436,Antedon_cf_parviflora_AP377MV:0.155957)1.00:0.062839,(((Colobometra_perspinosa:0.086807,((((Heterometra_crenulata:0.006056,Homalometra_denticulata:0.003709)1.00:0.047935,Zygometra_andromeda:0.062723)0.56:0.013107,(Himerometra_cf_robustipinna_HROB42:0.005020,Himerometra_robustipinna:0.016869)1.00:0.049517)1.00:0.030183,((Lamprometra_palmata:0.083948,Liparometra_articulata:0.072776)0.83:0.022447,Mariametra_subcarinata:0.066753)0.98:0.026921)1.00:0.049204)0.65:0.019934,Decametra_cf_alaudae_DECA32:0.025213)0.75:0.029324,Cyllometra_manca:0.022224,Oligometra_carpenteri:0.102051)0.78:0.060954)0.53:0.025143)0.71:0.019919,((Annametra_occidentalis:0.091972,Tropiometra_cf_carinata_MADA04:0.095919)0.97:0.026360,(((Antedon_bifida:0.014980,Antedon_mediterranea:0.020809)0.99:0.026351,Antedon_hupferi:0.054249)1.00:0.032165,Antedon_petasus:0.096723)1.00:0.080598)1.00:0.040582,(((Anthometrina_adriani:0.059767,((Florometra_asperrima:0.013019,Florometra_novaezealandiae:0.013702)1.00:0.019033,Florometra_serratissima:0.013711)0.64:0.016372)0.58:0.014159,Heliometra_glacialis:0.010194)1.00:0.037504,Comatonia_cristata:0.076709)1.00:0.040734,((((Asterometra_cf_cristata_ACRI45:0.046626,Ptilometra_macronema:0.060587)0.97:0.021178,Pterometra_trichopoda:0.043695)1.00:0.029318,(Calometra_discoidea:0.010975,Neometra_sappho:0.013183)1.00:0.056449)1.00:0.027775,Coccometra_hagenii:0.094168)0.67:0.021638,(Florometra_mawsoni:0.050177,Promachocrinus_kerguelensis:0.063024)1.00:0.064561)0.83:0.017055,Notocrinus_virilis:0.148894)1.00:0.047920,(Psathyrometra_sp_ME25:0.085619,Sarametra_triserialis:0.050222)0.98:0.025016)1.00:0.040377,(((((((Anneissia_bennetti:0.075488,Stenometra_cristata:0.189967)0.74:0.025249,((Capillaster_multiradiatus:0.068375,Capillaster_squarrosus:0.041550)1.00:0.065429,(((((((Clarkcomanthus_albinotus:0.017864,Clarkcomanthus_luteofuscum:0.014271)0.99:0.014842,Clarkcomanthus_comanthipinnus:0.072836)0.58:0.008300,Clarkcomanthus_littoralis:0.028133)0.93:0.014299,Clarkcomanthus_mirabilis:0.058056)0.80:0.021217,Comanthus_wahlbergii:0.092143)0.75:0.019733,Comanthus_gisleni:0.045518)1.00:0.023543,(Comaster_audax:0.069786,Comaster_schlegelii:0.026369)1.00:0.053992)1.00:0.036870)0.75:0.013710)0.77:0.022839,Comatella_stelligera:0.252713,Comatula_pectinata:0.174429)0.64:0.022139,Comissia_norfolkensis:0.099377,Phanogenia_gracilis:0.134349)0.62:0.022316,Aphanocomaster_pulcher:0.105138)0.99:0.019454,(Koehlermetra_porrecta:0.083005,Thalassometra_cf_margaritifera_THA38:0.133980)1.00:0.039273)1.00:0.058140,(((Charitometra_basicurva:0.036259,Chondrometra_rugosa:0.022686)1.00:0.025235,Strotometra_ornatissimus:0.056437)1.00:0.023600,(Pentametrocrinus_cf_semperi_PENT51:0.226362,(Thaumatocrinus_renovatus:0.064144,Vityazicrinus_sp_GWR2010:0.055359)1.00:0.031627)0.99:0.030915)1.00:0.046869)0.91:0.015987)0.78:0.019857)0.98:0.167939,(((Endoxocrinus_alternicirrus:0.054027,Endoxocrinus_parrae:0.088959)1.00:0.094121,(Hypalocrinus_naresianus:0.002402,Hypalocrinus_sp_HYP1:0.002052)1.00:0.075143)1.00:0.077157,(Metacrinus_levii:0.026334,((Metacrinus_rotundus:0.031446,(Metacrinus_serratus:0.007129,Saracrinus_nobilis:0.011721)0.80:0.004392)0.96:0.011262,Saracrinus_angulatus:0.010309)0.99:0.035024)0.98:0.166694)0.92:0.111526)0.78:0.078070,Caledonicrinus_vaubani:0.372676)0.65:0.062429)
;
end;
