# Supplementary material for: Abyssal fauna of the UK-1 polymetallic nodule exploration claim, Clarion-Clipperton Zone, central Pacific Ocean: Echinodermata
Source: Biodivers Data J. 2016 Jan 25;(4):e7251. doi: 10.3897/BDJ.4.e7251 (PMC4759440; doi:10.3897/BDJ.4.e7251)
Supplement: Supplementary material 4 — Tree file from Holothuroidea phylogenetic analyses [file biodiversity_data_journal-4-e7251-s004.con]

#NEXUS

[ID: 0093886982]
begin trees;
   [Note: This tree contains information on the topology, 
          branch lengths (if present), and the probability
          of the partition indicated by the branch.]
   tree con_50_majrule = (Evasterias_troschelii:1.975461,Pearsonothuria_graeffei:0.138247,((((((((Benthodytes_cf_sanguinolenta:0.237940,((Psychropotes_cf_semperiana:0.033771,Psychropotes_longicauda:0.059494)1.00:0.077161,Protelpidia_murrayi:0.369761)0.97:0.071802)0.86:0.166434,Pannychia_moseleyi:0.226832)1.00:0.468006,((((((((Apostichopus_japonicus:0.030552,Parastichopus_californicus:0.006162)1.00:0.135966,Australostichopus_mollis:0.168466)1.00:0.108600,(Thelenota_rubralineata:0.245724,(Astichopus_multifidus:0.003872,Isostichopus_macroparentheses:0.007273)1.00:0.290398)0.97:0.084342)0.61:0.052048,((Isostichopus_badionotus:0.068180,Isostichopus_fuscus:0.014944)1.00:0.165315,((Stichopus_chloronotus:0.202188,((((Stichopus_hermanni:0.031651,Stichopus_horrens:0.003536)1.00:0.014810,Stichopus_monotuberculatus:0.007576)1.00:0.059182,Stichopus_ocellatus:0.021224)0.55:0.010142,Stichopus_vastus:0.028539)0.94:0.048872)0.56:0.035014,Stichopus_naso:0.060832)1.00:0.202555)1.00:0.119675)0.58:0.072293,Stichopus_ellipes:0.304408)1.00:0.154123,((Athyonidium_chilensis:0.211959,Chiridota_laevis:0.243053)0.73:0.068768,((((Cucamba_psolidiformis:0.209923,(Psolus_charcoti:0.133866,Cucumaria_georgiana:0.294394)1.00:0.136960)0.82:0.072906,Cucumariidae_sp_RG2014:0.271305)1.00:0.093699,(Psolus_fabricii:0.071576,Psolus_phantapus:0.009094)1.00:0.241448)0.65:0.045125,((Cucumaria_frondosa:0.110687,Pentacta_pygmaea:0.177504)1.00:0.099961,Cucumaria_sp_ZP0016:0.227704)0.54:0.063978,Heterocucumis_steineni:0.277541,Pentamera_calcigera:0.641027)1.00:0.249289)1.00:0.282248)0.93:0.119673,(Molpadiida_sp_SHI2011a:0.353886,Molpadiida_sp_KKR2008:0.023613)1.00:0.424740)0.51:0.085574,Pseudostichopus_villosus:0.430168)0.81:0.162528)0.78:0.149227,(Mesothuria_bifurcata:0.240655,((Mesothuria_milleri:0.019730,Zygothuria_lactea:0.351745)0.99:0.071118,Mesothuria_multipora:0.094277)1.00:0.478217)1.00:0.269635)0.97:0.305757,Holothuria_sanctori:0.233189,Holothuria_excellens:0.259367)0.67:0.075859,(((((Apodida_sp_2_KKR2008:0.103963,Holothuria_pardalis:0.036383)0.94:0.046238,Holothuria_coluber:0.181807)1.00:0.143896,(Holothuria_aff_impatiens_KKR2008:0.133402,Holothuria_impatiens:0.169363)0.88:0.072426,(Holothuria_fuscocinerea:0.188327,Holothuria_pluricuriosa:0.189238)0.55:0.044877,(Holothuria_hilla:0.055876,(Holothuria_leucospilota:0.163953,Labidodemas_semperianum:0.181348)0.75:0.052415)1.00:0.067632,((Holothuria_arenicola:0.120816,((Holothuria_grisea:0.069121,Holothuria_inornata:0.065848)1.00:0.059377,Holothuria_kefersteini:0.128301,(((Holothuria_lentiginosa:0.053509,Holothuria_zacae:0.004135)0.94:0.010799,(((Holothuria_arguinensis:0.021539,Holothuria_mammata:0.062316)0.90:0.015162,Holothuria_tubulosa:0.044248)0.89:0.016683,Holothuria_dakarensis:0.044199)0.67:0.011070)1.00:0.077874,Holothuria_poli:0.044825)0.93:0.030499,((Holothuria_glaberrima:0.097564,Holothuria_portovallartensis:0.084562)1.00:0.072973,((Holothuria_carere:0.071178,(Holothuria_lubrica:0.043327,Holothuria_theeli:0.065347)1.00:0.057770)1.00:0.079626,Holothuria_moebii:0.122680)0.93:0.045567)0.59:0.028135,((((Holothuria_bacilla:0.011966,Holothuria_mactanensis:0.003133)1.00:0.032790,(Holothuria_erinacea:0.121260,Holothuria_parva:0.060700)0.72:0.024626)1.00:0.052856,Holothuria_cinerascens:0.163652)0.98:0.045190,((Holothuria_edulis:0.018387,Holothuria_nigralutea:0.055653)0.89:0.031577,Holothuria_signata:0.023759)1.00:0.078411)0.93:0.042736)0.67:0.034381,(Holothuria_floridana:0.010951,Holothuria_mexicana:0.003759)1.00:0.097832,Holothuria_atra:0.200647)0.97:0.051123,((((Holothuria_imitans:0.063062,Holothuria_surinamensis:0.046994)0.90:0.032459,Holothuria_languens:0.081784)0.74:0.031609,Holothuria_flavomaculata:0.156877)0.99:0.047282,Holothuria_notabilis:0.260275)0.55:0.025582)0.79:0.051621,((Holothuria_ocellata:0.099317,Holothuria_scabra:0.106034)0.99:0.099211,Holothuria_scabra_versicolor:0.261462)1.00:0.114888)1.00:0.169773,(Holothuria_nobilis:0.053628,Holothuria_whitmaei:0.071095)1.00:0.217480)0.80:0.080346,(Holothuria_austrinabassa:0.179901,Holothuria_forskali:0.125459)0.98:0.206346)0.64:0.073639)0.99:0.162206,((Actinopyga_agassizi:0.002624,Actinopyga_sp_AK2003:0.002907)1.00:0.276052,(((((Actinopyga_caerulea:0.009939,(Actinopyga_palauensis:0.005787,Actinopyga_obesa:0.019529)0.78:0.007521)1.00:0.085520,(Actinopyga_lecanora:0.140814,Actinopyga_miliaris:0.148749)0.75:0.050340)0.96:0.057726,Actinopyga_echinites:0.114003)0.81:0.037808,Actinopyga_spinea:0.032625)0.84:0.059005,Actinopyga_mauritiana:0.181462)0.73:0.043380)1.00:0.387121)0.73:0.103672,(((Bohadschia_argus:0.013512,Bohadschia_atra:0.021347)0.99:0.014350,Bohadschia_cousteaui:0.016296)0.97:0.014472,Bohadschia_paradoxa:0.029475,Bohadschia_sp_3_SWK2011:0.027636,(Bohadschia_bivittata:0.007825,Bohadschia_vitiensis:0.002822)1.00:0.078473,(Bohadschia_sp_2_SWK2011:0.056500,Bohadschia_marmorata:0.109317)0.55:0.021224,Bohadschia_sp_1_SWK2011:0.027824)1.00:0.270165)0.99:0.303060);
end;
