# Supplementary material for: Abyssal fauna of the UK-1 polymetallic nodule exploration claim, Clarion-Clipperton Zone, central Pacific Ocean: Echinodermata
Source: Biodivers Data J. 2016 Jan 25;(4):e7251. doi: 10.3897/BDJ.4.e7251 (PMC4759440; doi:10.3897/BDJ.4.e7251)
Supplement: Supplementary material 5 — Tree file from Ophiuroidea phylogenetic analyses [file biodiversity_data_journal-4-e7251-s005.con]

#NEXUS[written Mon Oct 19 13:43:56 BST 2015 by Mesquite version 3.02 (build 681) at helenascomputer.nhm.ac.uk/157.140.91.71]
BEGIN TREES;
	LINK Taxa = Taxa;
[! Trees from source: 'Current Tree (Tree(s) used from Trees from "ophiuroidcomb.nex.con". Last tree used: con 50 majrule [tree: (59:0.5185515,((4:0.193357,6:0.111863)1.00:0.164384,((74:0.530345,((7:0.213393,8:0.257974)1.00:0.145117,(64:0.312953,73:0.127253,(72:0.263355,(1:0.266796,(5:0.148107,(2:0.155738,3:0.348861)1.00:0.10185)1.00:0.107782):0.127022)1.00:0.073777)0.99:0.02176)0.63:0.026785)0.7…
	TRANSLATE
		1	Ophiuroidea_sp_NHM_041,
		2	Ophiuroidea_sp_NHM_072,
		3	Ophiotholia_sp_NHM_076,
		4	Perlophiura_profundissima,
		5	Ophiuroidea_sp_NHM_303,
		6	Ophiomusium_cf_glabrum,
		7	Amphioplus_cf_daleus,
		8	Amphipholis_squamata,
		9	Asteromorpha_capensis,
		10	Asteromorpha_rousseaui,
		11	Asteronyx_loveni,
		12	Asteroporpa_australiensis,
		13	Asteroporpa_hadracantha,
		14	Asteroporpa_muricatopatella,
		15	Asteroporpa_reticulata,
		16	Asteroschema_ajax,
		17	Asteroschema_edmondsoni,
		18	Asteroschema_horridum,
		19	Asteroschema_migrator,
		20	Asteroschema_oligactes,
		21	Asterostegus_sp_SMNH_Type8333,
		22	Asterostegus_tuberculatus,
		23	Astroboa_arctos,
		24	Astroboa_globifera,
		25	Astroboa_nigrofurcata,
		26	Astroboa_nuda,
		27	Astroboa_sp_FMNH_UF5053,
		28	Astroboa_sp_RUMF_ZE00014,
		29	Astrobrachion_adhaerens,
		30	Astrobrachion_constrictum,
		31	Astroceras_annulatum,
		32	Astroceras_compar,
		33	Astroceras_nodosum,
		34	Astroceras_pergamenum,
		35	Astroceras_pleiades,
		36	Astroceras_spinigerum,
		37	Astrocharis_monospinosa,
		38	Astrochele_lymani,
		39	Astrochele_pacifica,
		40	Astrochlamys_sol,
		41	Astrocladus_coniferus,
		42	Astrocladus_exiguus,
		43	Astrodendrum_sagaminum,
		44	Astrodendrum_sp_NSMT_E6273,
		45	Astrodia_tenuispina,
		46	Astroglymma_sculptum,
		47	Astrohamma_tuberculatum,
		48	Astrophyton_muricatum,
		49	Astrosierra_amblyconus,
		50	Astrothamnus_echinaceus,
		51	Astrothorax_misakiensis,
		52	Astrothorax_waitei,
		53	Astrothrombus_chrysanthi,
		54	Astrothrombus_rugosus,
		55	Astrothrombus_vecors,
		56	Astrotoma_agassizii,
		57	Conocladus_australis,
		58	Euryale_aspera,
		59	Evasterias_troschelii,
		60	Gorgonocephalus_chilensis,
		61	Gorgonocephalus_eucnemis,
		62	Gorgonocephalus_pustulatum,
		63	Gorgonocephalus_tuberosus,
		64	Ophiocoma_echinata,
		65	Ophiocreas_ambonesicum,
		66	Ophiocreas_caudatus,
		67	Ophiocreas_glutinosum,
		68	Ophiocreas_japonicus,
		69	Ophiocreas_oedipus,
		70	Ophiocreas_sibogae,
		71	Ophiocreas_spinulosus,
		72	Ophiomyxa_anisacantha,
		73	Ophionereis_reticulata,
		74	Ophiopholis_aculeata,
		75	Squamophis_albozosteres,
		76	Squamophis_amamiensis,
		77	Sthenocephalus_anopla,
		78	Trichaster_acanthifer,
		79	Trichaster_palmiferus;
	TREE con_50_majrule = (59:0.5185515,((4:0.193357,6:0.111863)1.00:0.164384,((74:0.530345,((7:0.213393,8:0.257974)1.00:0.145117,(64:0.312953,73:0.127253,(72:0.263355,(1:0.266796,(5:0.148107,(2:0.155738,3:0.348861)1.00:0.10185)1.00:0.107782):0.127022)1.00:0.073777)0.99:0.02176)0.63:0.026785)0.70:0.056477,((11:0.064229,45:0.077043)1.00:0.120083,(((37:0.085996,(75:0.07114,76:0.098418)1.00:0.065942)1.0…
END;
